# Supplementary material for: Two dimensional honeycomb-kagome Be3Pb2: a mechanically flexible topological insulator with high intrinsic carrier mobilities
Source: Royal Society of Chemistry journal article supplement (doi:10.1039/d0cp04512h), 2020-12-11
Supplement: d0cp04512h1.pdf [file d0cp04512h1.pdf]

## Supplementary information

### Two dimensional honeycomb-kagome $\text{Be}_3\text{Pb}_2$ : a mechanically flexible topological insulator with high intrinsic carrier mobilities

Tingting Zhang\* and Liyan Zhu

#### S1. Molecular dynamics (MD) simulation

To verify the thermodynamic stability of 2D  $\text{Be}_3\text{Pb}_2$ , we carried out a canonical MD simulation by using SIESTA. The exchange and correlation interaction between electrons were described by generalized gradient approximation as parameterized by Perdew, Burke, and Ernzerhof; while the interaction between electrons and ions was modeled by the norm-conserving pseudopotential. The energy cutoff was as high as 200 Ry. The structure employed in MD simulation is a rectangular shaped supercell of 2D  $\text{Be}_3\text{Pb}_2$  with a size of  $40.95 \times 42.56 \text{ \AA}^2$ . The temperature was set to be 300 K, and the time step 1 fs. The snapshot of the structure after 5 ps is shown in Fig. S1. Apparently, we do not spot any broken bonds between Be and Pb atoms. Hence, the 2D  $\text{Be}_3\text{Pb}_2$  is thermodynamically stable at room temperature.

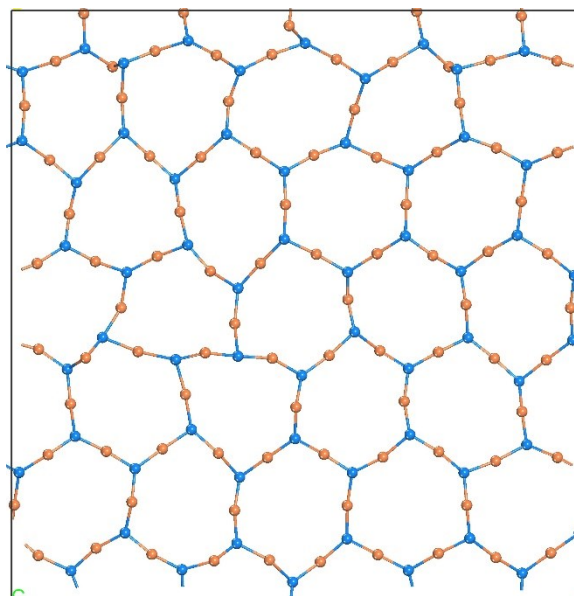

Figure S1. A snapshot of 2D Be<sub>3</sub>Pb<sub>2</sub> after a canonical molecular dynamics simulation.

### S2. Phonon dispersion

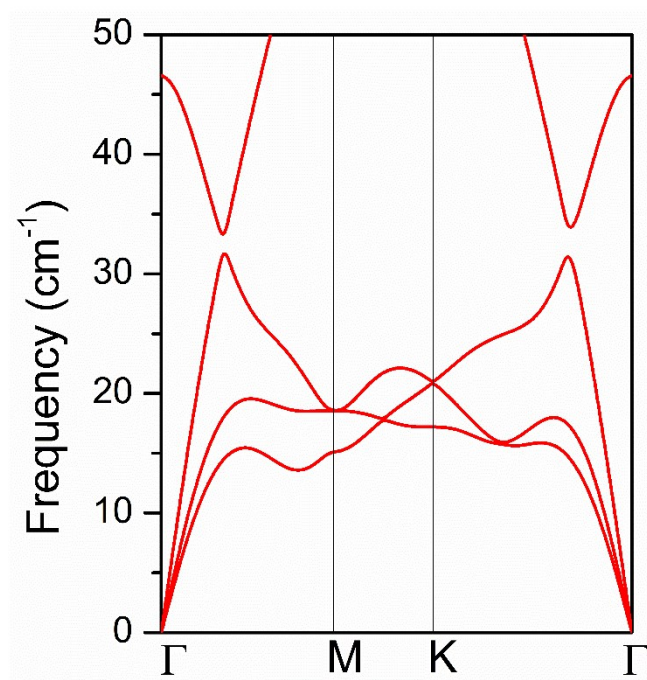

Figure S2. Dispersions of acoustic phonons.

### S3. Deformation potential

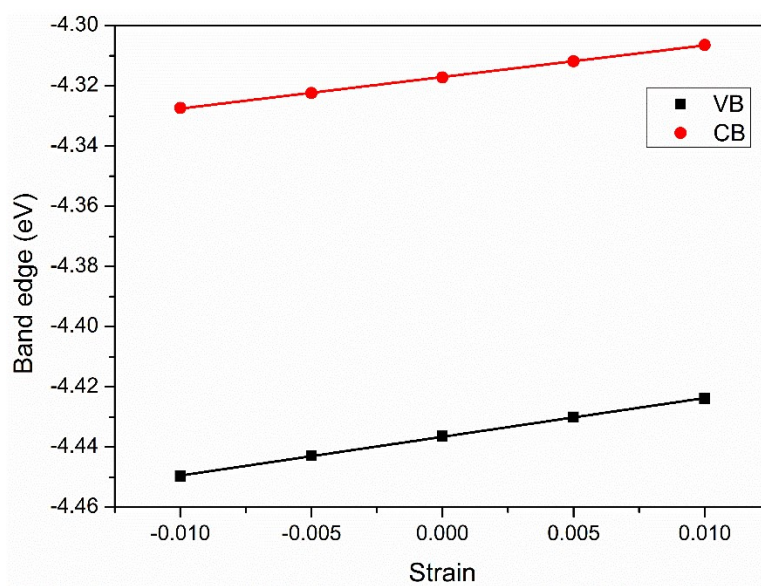

Figure S3. The band edges as a function of mono-axial strain exerted along the zigzag

direction. The energies of band edges are referenced to the vacuum level. The slopes of linear fitting curves give rise to the deformation potential constants for both valence (VB) and conduction (CB) bands.

#### S4. Band structures of strained 2D Be<sub>3</sub>Pb<sub>2</sub>.

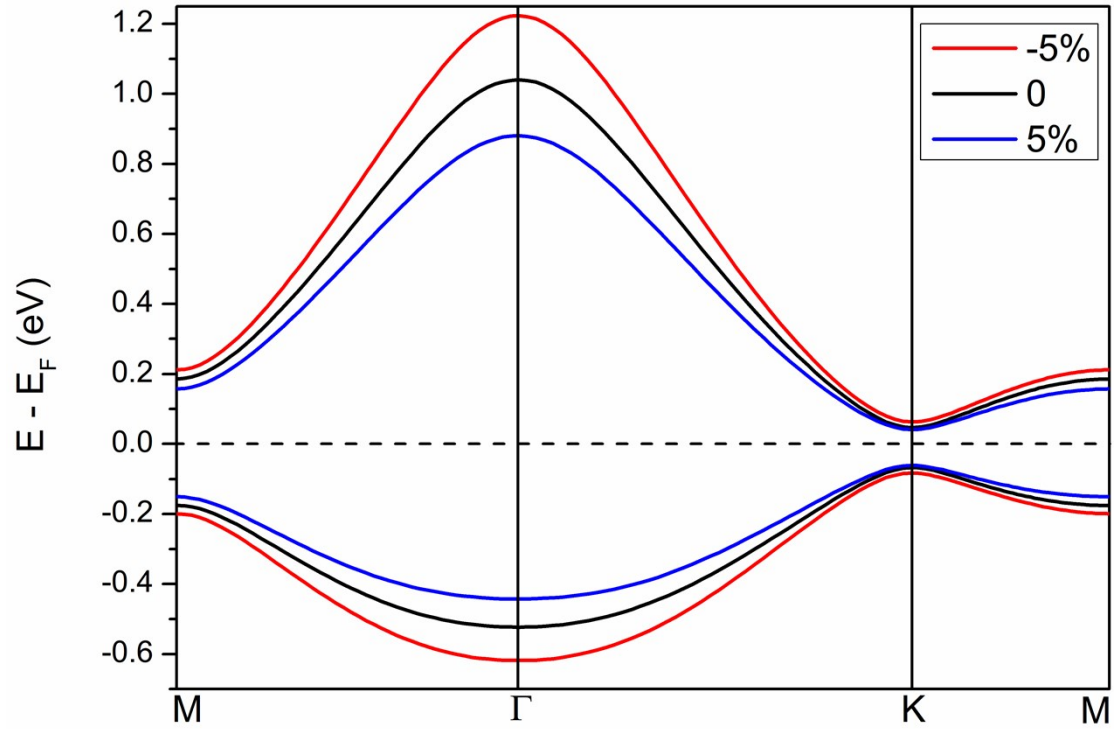

Figure S4. The lowest conduction bands and highest conduction bands of the biaxial-strained 2D Be<sub>3</sub>Pb<sub>2</sub>.
